# A drug combination targeting hypoxia induced chemoresistance and stemness in glioma cells

Akansha Jalota<sup>1,2</sup>, Mukesh Kumar<sup>1</sup>, Bhudev C. Das<sup>3,4</sup>, Ajay K. Yadav<sup>3</sup>, Kunzang Chosdol<sup>2</sup> and Subrata Sinha<sup>1,2</sup>

<sup>1</sup>National Brain Research Centre, Manesar, Gurgaon-122051, India

<sup>2</sup>Department of Biochemistry, All India Institute of Medical Sciences, New Delhi-110029, India

<sup>3</sup>Dr. B. R. Ambedkar Center for Biomedical Research, University of Delhi, Delhi-110007, India

<sup>4</sup>Amity Institute of Molecular Medicine and Stem Cell Research, Amity University, Noida-201313, India

**Correspondence to:** Subrata Sinha, **email:** sub\_sinha@hotmail.com, subrata.sinha@nbrc.ac.in

**Keywords:** BCNU; hypoxia; PGE<sub>2</sub>; chemosensitization; COX-2 inhibitor

**Received:** July 05, 2017

**Accepted:** February 21, 2018

**Published:** April 06, 2018

**Copyright:** Jalota et al. This is an open-access article distributed under the terms of the Creative Commons Attribution License 3.0 (CC BY 3.0), which permits unrestricted use, distribution, and reproduction in any medium, provided the original author and source are credited.

## ABSTRACT

**Hypoxia is a characteristic of solid tumors especially Glioblastoma and is critical to chemoresistance. Cancer stem cells present in hypoxic niches are known to be a major cause of the progression, metastasis and relapse. We tried to identify synergistic combinations of drugs effective in both hypoxia and normoxia in tumor cells as well as in cancer stem cells. Since COX-2 is over-expressed in subset of glioblastoma and is also induced in hypoxia, we studied combinations of a prototype Cyclooxygenase (COX-2) inhibitor, NS-398 with various drugs (BCNU, Temozolomide, 2-Deoxy-D-glucose and Cisplatin) for their ability to abrogate chemoresistance under both severe hypoxia (0.2% O<sub>2</sub>) and normoxia (20% O<sub>2</sub>) in glioma cells. The only effective combination was of NS-398 and BCNU which showed a synergistic effect in both hypoxia and normoxia. This synergism was evident at sub-lethal doses for either of the single agent. The effectiveness of the combination resulted from increased pro-apoptotic and decreased anti-apoptotic molecules and increased caspase activity. PGE<sub>2</sub> levels, a manifestation of COX-2 activity were increased during hypoxia, but were reduced by the combination during both hypoxia and normoxia. The combination reduced the levels of epithelial-mesenchymal transition (EMT) markers. It also resulted in a greater reduction of cell migration. While single drugs could reduce the number of gliomaspheres, the combination successfully abrogated their formation. The combination also resulted in a greater reduction of the cancer stem cell marker CD133. This combination could be a prototype of possible therapy in a tumor with a high degree of hypoxia like glioma.**

## INTRODUCTION

WHO Grade IV glioma or Glioblastoma (GBM) are the most aggressive brain tumors. These are characterized by a hypoxic inner core which bestows the tumor with more aggressive properties including invasion, metastasis and chemoresistance. Hypoxia may induce drug resistance by the activation of several pathways as mediated by COX-2, PI3K pathway, AP1, c-Jun, Pim1 or Stat3 [1].

The hypoxic zone is known to harbor a subset of cells which have stem cell like properties and are known as cancer stem cells. These are characterized by alterations in genetic makeup, tumor initiating, and differentiation capacity which are important for relapse of the disease [2-4]. Clinically used anti-tumor drugs (alkylating agents, metabolic inhibitors etc.) against glioma increase the medial survival of the patient only by several months. This may happen due to chemoresistance which can

be attributed to the altered intrinsic and/or extrinsic (microenvironment/hypoxia related) factors. It is also well documented that chemotherapy gives rise to acquired chemoresistance (pan-resistance), in cancer cells as an adaptive mechanism [5]. A possible strategy to overcome the same is by using drug combinations with known activities. We have earlier shown the synergistic effect of 2-deoxy-D-glucose and cisplatin on cell monolayers under both hypoxia and normoxia. However this involved a distinct mechanism of conversion of autophagy to apoptosis, and also the effect on cancer stem cells was not demonstrated [6].

A well known mediator of pro-tumorigenic inflammation is COX-2. It is highly upregulated in many cancers including gliomas and is involved in tumor progression [7, 8]. COX-2 also helps in the proliferation of cancer stem cells [9]. It is responsible for the synthesis of prostanoids (prostaglandins, prostacyclin, and thromboxane) from the precursor arachidonic acid. Prostaglandins produced by COX-2 trigger the release of proinflammatory chemokines [10]. Indeed it is now well established that inflammation is a critical and enabling characteristic of tumorigenesis [11, 12]. This synergism towards tumor progression and metastasis makes this protein a potential therapeutic target. Since chemoresistance is very closely associated with hypoxia and COX-2 overexpression in tumor as well as stromal cells, inhibition of COX-2 activity may result in increased efficacy of conventional therapies (chemotherapy and radiation). In addition, there is also a possibility of COX-2 affecting angiogenesis, Epithelial Mesenchymal Transition (EMT) and spheroid formation which helps in tumor progression [13–16]. It has been reported by Tian *et al.* 2017 that TGF- $\beta$  induced stemness in triple negative breast cancer is regulated by COX-2 [17]. Stemness property induced by COX-2 is also seen in colorectal cancer and its inhibitor in combination with EGFR inhibitor affect stemness related pathways [18].

Inhibiting COX-2 activity/expression suppresses the growth of various tumors [19, 20]. Several molecules (Etodolac, Celecoxib, NS-398 etc.) that specifically inhibit COX-2 expression/activity, reduce cell proliferation, angiogenesis, invasion and metastasis of tumor cells [21]. Several such COX-2 specific inhibitors are in preclinical or clinical trials though as of now their use is not very widespread [22–24]. NS-398 is a prototype of specific inhibitor of COX-2 that affects the activity of the enzyme. The inhibitory effect of this competitive inhibitor has been shown to result in reduced cell proliferation, invasiveness, metastasis, and increased apoptosis [7, 25]. However, NS-398 upregulates COX-2 expression at transcriptional level by a feedback loop mechanism [26], which may limit its efficacy. There are different reports on the effects of Celecoxib on EMT, the effect varies with the type of cancer and cell line. In colon cancer cells, celecoxib suppresses EMT [27]. However, celecoxib induces EMT

in non-small cell lung carcinoma and epithelial ovarian cancer [28, 29] and this has been implicated in generation of a chemoresistant sub-population leading to tumor progression through invasion and metastasis [30, 31]. Since the heterogeneous populations within tumors need several altered pathways for their survival and progression, multi-modal drug combinations that affect different distinct pathways, may have a better therapeutic effect. Also, such combinations, especially involving COX-2 inhibitors may have better cytotoxicity at lower oxygen concentrations. Earlier studies showed that inhibition of COX-2 (by NS-398) along with epidermal growth factor receptor (EGFR) (through gefitinib) resulted in increased cytotoxicity of Docetaxel along with reduced cancer cell migration [32].

Hypoxia is known to induce cancer stem cells, which may result in increased therapeutic resistance for different modalities like chemotherapy and radiotherapy [2, 33–35]. Glioma stem cells (GSCs) are capable of tumor initiation, self renewal, and differentiation which leads to tumor heterogeneity, metastasis and repopulation of tumor after therapy [36]. Dedifferentiation of a tumor by hypoxia helps in the maintenance of stem like properties of tumor cells by the expression of genes like Oct4, SOX-2 and Nanog. CD133 is a known glioma cancer stem cell marker which helps in the identification of glioma cancer stem cells which show tumorigenic properties [37]. Hence there is a need to identify potential targets that regulate these glioma cancer stem cells in order to improve therapy. As COX-2 inhibitors are emerging as therapeutic agents for cancers, including cancer stem cells, it is important to study drug combinations that could improve their efficacy under both hypoxia and normoxia. Hypoxia also induces EMT which in turn is a regulator of stemness and hence a major contributor to drug resistance [38]. Therefore COX-2 inhibitors can be potential therapeutic agents for glioma cells. *In-vitro* studies of drug sensitivity and resistance are usually performed in 20% oxygen (atmospheric pressure). Even normal tissue under the best conditions of oxygenation rarely ever approaches this level of oxygenation. On the basis of EF5 binding technique which gives oxygen tension in the tissues as reported by Evan *et al* [39], WHO grade II tumors were characterized by modest cellular hypoxia ( $pO_2 \sim 10\%$ ) and grade III tumors by modest-to-moderate hypoxia ( $pO_2 \sim 10\% - 2.5\%$ ). Severe hypoxia, taken as approximately 0.1–0.2%  $O_2$  was found in Grade IV tumors.

In this study we have exposed GBM cells under severe hypoxia (0.2%  $O_2$ ) and normoxia (20%  $O_2$ ) to various drug combinations in order to simulate the *in-vivo* tumor microenvironment. NS-398 was taken as the prototype COX-2 inhibitor which was used in combination with the drugs (BCNU, Temozolomide (TMZ), Cisplatin (CP) and 2-Deoxy-D- glucose (2-DG)). While TMZ and BCNU are being used in glioma [40–42], CP and 2-DG have been tried earlier [6, 43–46]. We

observed synergism under both hypoxia and normoxia, only with the combination of NS-398 and BCNU. This was reflected in the extent of decrease of the inflammatory modulator PGE<sub>2</sub> which is the product of COX-2. We observed increased cell death with increased expression of pro-apoptotic markers. There was also decreased expression of the EMT markers and cell migration. Importantly the combination abrogated gliomaspheres formation and reduced CD133 expression.

## RESULTS

### Up regulation of COX-2 expression under hypoxia in glioma cells

Effect of hypoxia on COX-2 expression was checked at the level of mRNA and protein in the glioma cell lines (U87MG and LN229), maintained under both hypoxic and normoxic conditions. We observed increased expression of COX-2 at both mRNA and protein level under hypoxia in both the cell lines (Figure 1). The expressions of hypoxia markers (CA9, VEGF and PGK1) as well as COX-2 mRNA were studied after exposure to severe hypoxia (0.2% O<sub>2</sub>) for 24, 48 and 72 hours. The hypoxia markers were upregulated at all the time points but the values at 48 and 72 hours were higher than at 24 hours in both the cell lines (Supplementary Figure 1(i)). COX-2 mRNA and protein expression were also increased after 24, 48 and 72 hours of hypoxia exposure in both the cell lines but the values at 48 and 72 hours were more than those for 24 hours. (Supplementary Figure 1(i, ii)).

### Dose dependent reduction in cell viability by the COX-2 inhibitor (NS-398) and BCNU in glioma cells under hypoxia and normoxia

In order to study synergism with NS-398, firstly sub-lethal drug concentrations were determined by exposing cells to individual drugs - BCNU, CP, 2-DG and TMZ. Only sub-lethal doses were used to study the synergistic interaction of the combination (as calculated by Combination Index - CI). Of the several combinations tested, only the combination of NS-398 with BCNU showed synergistic effect (as determined by a CI of < 0.9) under hypoxia and normoxia in both the cell lines (Figure 2), (Supplementary Figure 2). This synergistic combination of BCNU and NS-398 at 75 μM of BCNU with 200 μM of NS-398, has been studied further.

### Increased apoptosis is induced by the combination of NS-398 and BCNU

The mechanism of cell death by the combination was studied at the above mentioned concentrations of BCNU and NS-398 by propidium iodide staining (Supplementary Figure 3). Increased sub-G1 cells (indicating apoptosis) were observed by the combination under all the conditions tested (Supplementary Figure 3). This is in concordance with the reduction in cell viability by MTT assay. For apoptosis, we did a dual PI and Annexin V staining at 48 hours (to assess early apoptosis), and a PI staining at 72 hours for late apoptosis. At 48 hours, the dual PI and Annexin V staining revealed increased early apoptosis (increase in Annexin V positive and PI negative cells) for the combination as compared to the individual drugs (Figure 3(i, ii)).

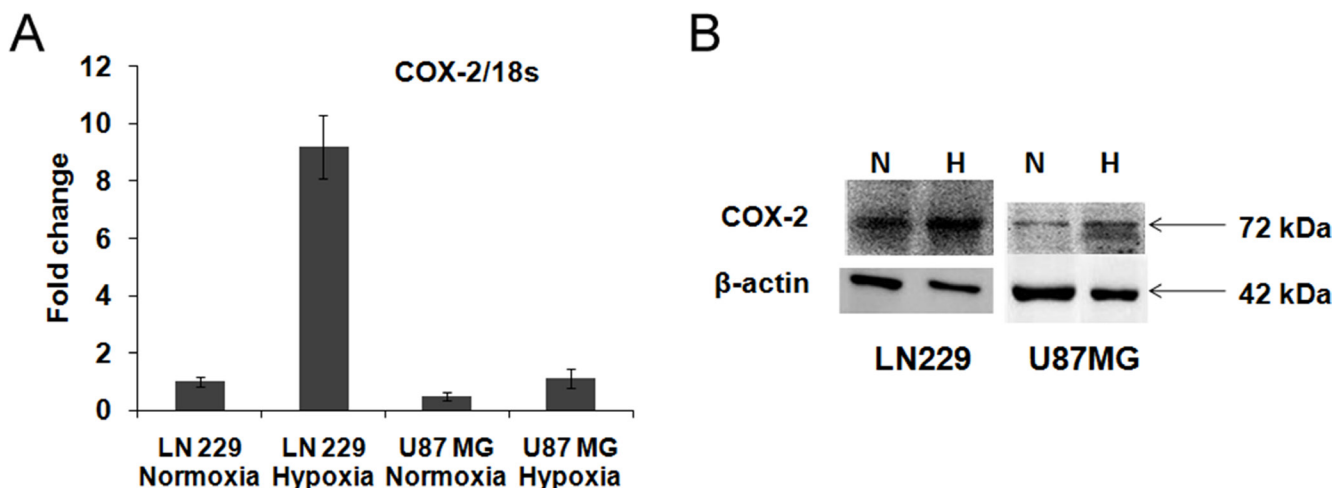

**Figure 1: COX-2 expression in glioma cell lines.** (A) mRNA level expression. COX-2 expression was found in LN229 and U87MG cell lines and it was up-regulated under hypoxia in LN229 (9 fold change,  $p < 0.001$ ) and U87MG cell line (2.2 fold change,  $p < 0.01$ ). (B) Protein level expression. COX-2 protein expression was found in LN229 and U87MG cell lines and it was up-regulated under hypoxia in LN229 (1.9 fold change) and U87MG (1.3 fold change) cell lines. Lane N denotes Normoxia control, Lane H denotes Hypoxia control. β-actin was used as a control. Overall there is increase in both COX-2 mRNA and protein expression during hypoxia.

Correspondingly at 72 hours, the total apoptosis as revealed by increased sub G1 fraction in PI staining, was more in the combination (Supplementary Figure 3A and 3B represent LN229 and U87MG cell lines respectively).

### Apoptosis induced by the combination of BCNU and NS-398 is caspase dependent

Caspase 3/7 activity was investigated to confirm whether the apoptosis induced by the combination was caspase dependent or independent. Caspase 3/7 activity (after 48 hours of drug treatment) was upregulated by the combination as compared to the single agent under all the conditions tested (Figure 4(i)). However the increase in the caspase 3/7 activity by the combination of BCNU and NS-398 was more in LN229 as compared to U87MG cell line under both the oxygen concentrations. Viability of both cell lines treated by the combination in presence and absence of inhibitor was assessed at 24, 48 and 72 hours. Addition of the caspase inhibitor Q-VD-OPh (20  $\mu$ M) to the individual drugs as well as to the combination of the drugs, resulted in a decrease in the caspase activity and increase in the cell viability (Figure 4(i), 4(ii)). The time kinetics of cell viability is depicted in Supplementary Figure 4. Cell death with the combination and its reversal with the inhibitor started at

48 hours and was more evident at 72 hours. This further confirmed that the apoptosis induced by the combination was caspase dependent.

### Apoptotic markers induced by the drug combination

To further investigate the mechanism of increased apoptosis in the combination, pro-apoptotic markers (Bax, caspase 3, cytochrome c) and the anti-apoptotic marker (Bcl-2) were analyzed at the level of mRNA in the cells treated individually or by the combination. The expression of pro-apoptotic markers (Bax, caspase3 and cytochrome c) were found to be increased in both the cell lines treated with the combination as compared to the control or the single agents, under both hypoxia and normoxia. The degree of increase under normoxia was higher in the cells treated with the combination in comparison to hypoxia. The increase in the levels of pro-apoptotic markers under hypoxia is however interesting in the context of their low base line. (Figure 5(i, ii)). Anti-apoptotic marker Bcl-2 was found to be reduced by the combination as compared to the control as well as by the single agent in both the cell lines under hypoxia as well as normoxia. However, the degree of reduction under normoxia was much more than hypoxia in both the cell lines treated with the combination.

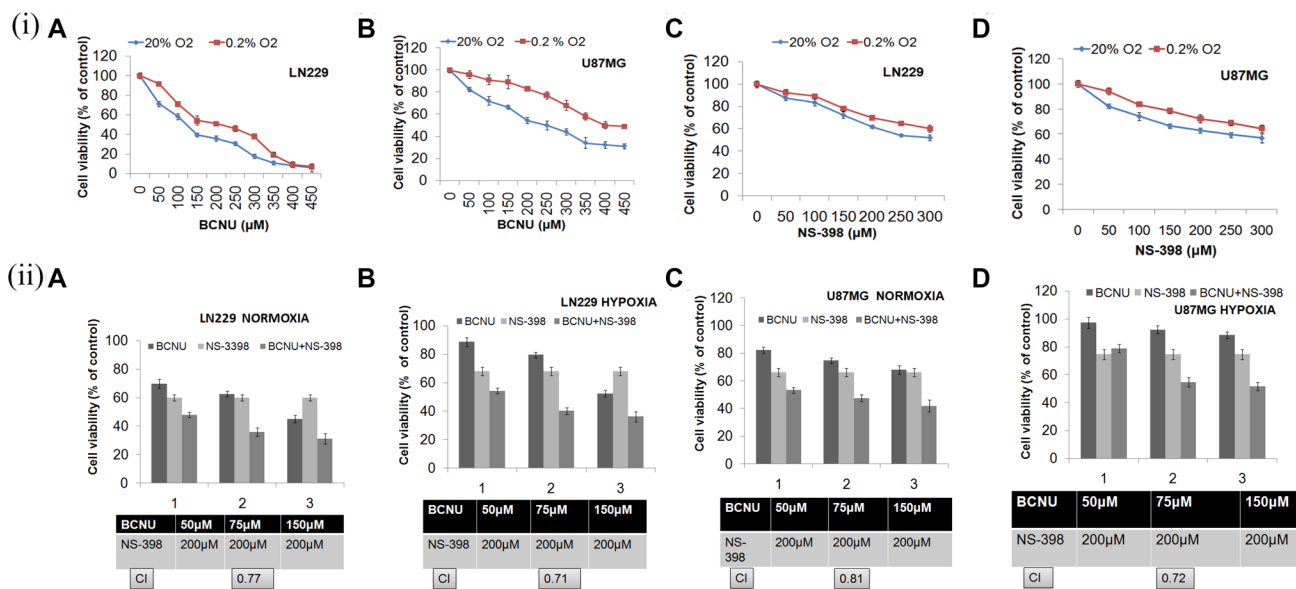

**Figure 2:** (i) Cell viability analysis at different doses of BCNU and NS-398. Both the cell lines were treated with increasing concentrations of BCNU and NS-398 and cell viability was assessed by MTT assay. Dose dependent cytotoxicity of BCNU and NS-398 was observed in (A, C) LN229 and (B, D) U87MG cell lines under hypoxia and normoxia. Results were expressed as mean  $\pm$  SD of three experimental replicates. Under all conditions, drug effect of individual drugs was reduced under hypoxia. (ii) Cell viability analysis after treatment with the combination (BCNU + NS-398). Cells were treated with BCNU, NS-398 and BCNU + NS-398 and cell viability was assessed after 72 hours of treatment by MTT assay. The combination of BCNU + NS-398 (75  $\mu$ M of BCNU and 200  $\mu$ M of NS-398) showed synergism (CI < 0.9) under both hypoxia and normoxia in both cell lines: (A, B) LN229 and (C, D) U87MG cell lines. Results were expressed as mean  $\pm$  SD of three experimental replicates. The combination had more effect than either single agent. This was true for normoxia ( $p < 0.01$  with BCNU and  $p < 0.01$  with NS-398) as well as hypoxia ( $p < 0.01$  for BCNU and  $p < 0.01$  for NS-398) for LN229 with reference to this synergistic combination. Also, for U87MG the levels of significance for normoxia were  $p < 0.01$  for BCNU and  $p < 0.05$  for NS-398. For hypoxia the levels of significance were  $p < 0.05$  for BCNU and  $p < 0.05$  for NS-398.

This may be due to the increased Bcl-2 expression level under hypoxia in both the cell lines (Figure 5(i, ii)). Further confirmation of the mRNA findings was done with protein analysis of representative pro (Bax) and anti-apoptotic (Bcl2) marker in the LN229 cell line (Figure 5(iii)). Bax was upregulated by the combination and Bcl2 was downregulated by the combination as compared to control and single agent.

### Reduced PGE<sub>2</sub> activity induced by the drug combination under hypoxia and normoxia

PGE<sub>2</sub> levels were taken as a measure of COX-2 activity. These were reduced by both BCNU and NS-398 individually, and further lowered by the combination under hypoxia and normoxia in both the cell lines. Untreated

hypoxic cells had a higher degree of COX-2 activity than normoxic controls. (Figure 6), but the marked decrease by the combination was evident even in hypoxia.

### Drug combination downregulates EMT and cell migration in glioma cells

As COX-2 is reported to increase EMT, mRNA levels of EMT markers were evaluated individually and for the combination. Overall a greater decrease in the level of the EMT inducers, vimentin and N-cadherin, under hypoxia as well as normoxia was observed after treatment with the combination as compared to the individual drugs, indicating augmented reversal of EMT parameters (Figure 7(i, ii)). Decrease in the level of these EMT marker proteins by the combination as compared to single

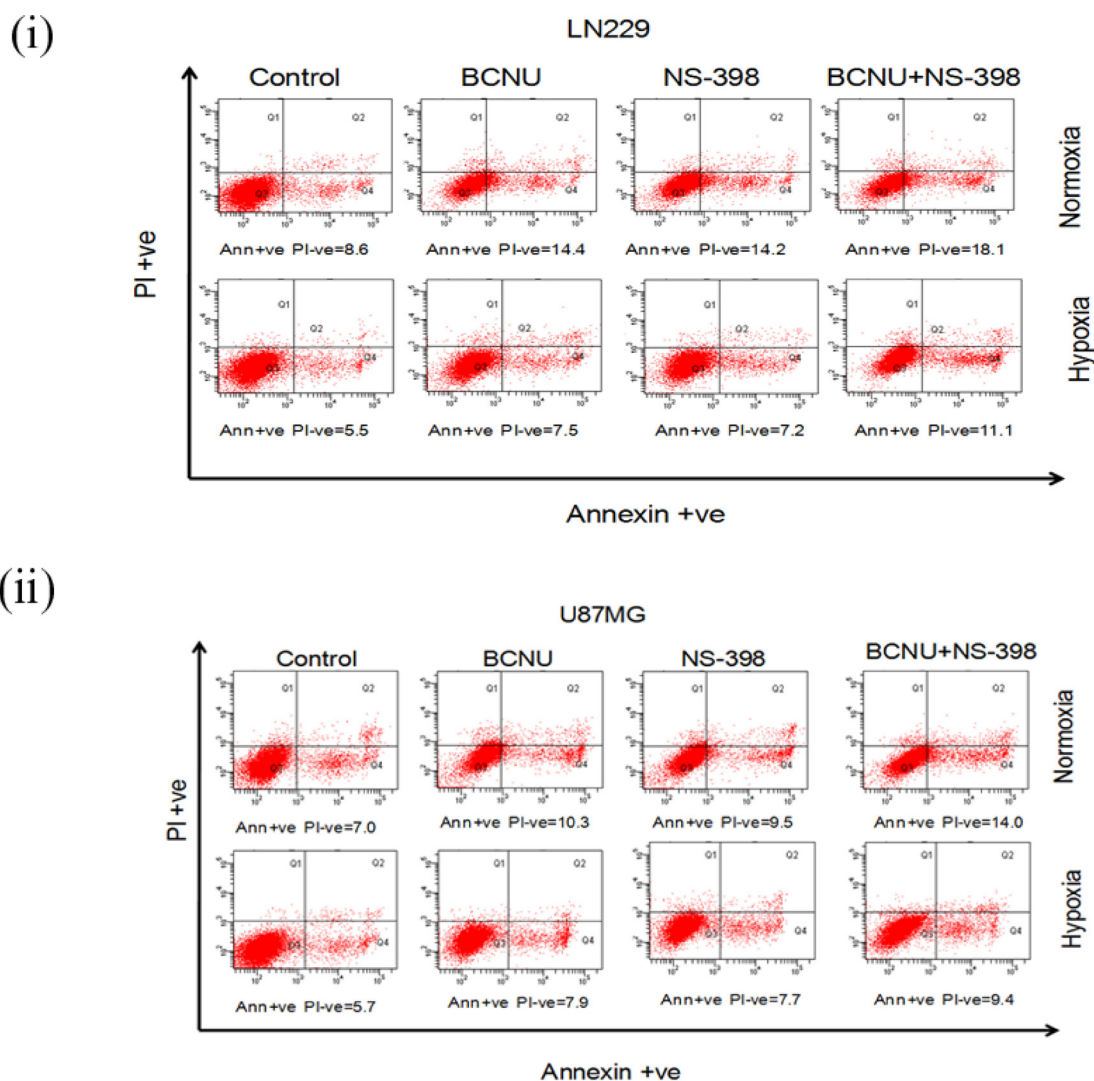

**Figure 3: PI and Annexin V staining of glioma cells after drug treatment.** (i) LN229 and (ii) U87MG cells were treated with drugs (BCNU, NS-398 and combination) after 24 hours of normoxia and hypoxia and the same state continued throughout the experiment. PI and Annexin V staining was done after 48 hours of drug treatment. It was observed that there was a distinct increase in early apoptosis induced by the combination (BCNU + NS-398) as compared to single agent (BCNU or NS-398). Early apoptosis is depicted by Annexin V positive and PI negative cells. The percentage of cells with staining are depicted below each plot.

agent in LN229 cell line corroborated with mRNA level findings (Figure 7(iii)). EMT is directly correlated with migration that was studied by trans-well membrane assay. A greater reduction in the cell migration was seen by the combination as compared to the individual drugs (Figure 8(i)). There was significant reduction in the percentage of migration of the cells exposed to the combination as compared to the single agent (Figure 8(ii)).

### Efficacy of the drug combination on glioma stem cells

COX-2 is known to regulate the proliferation of cancer stem cells and its expression is aggravated by hypoxia. The effect of combination has been studied only in U87MG cells since LN229 do not form gliomaspheres under the usual growth conditions.

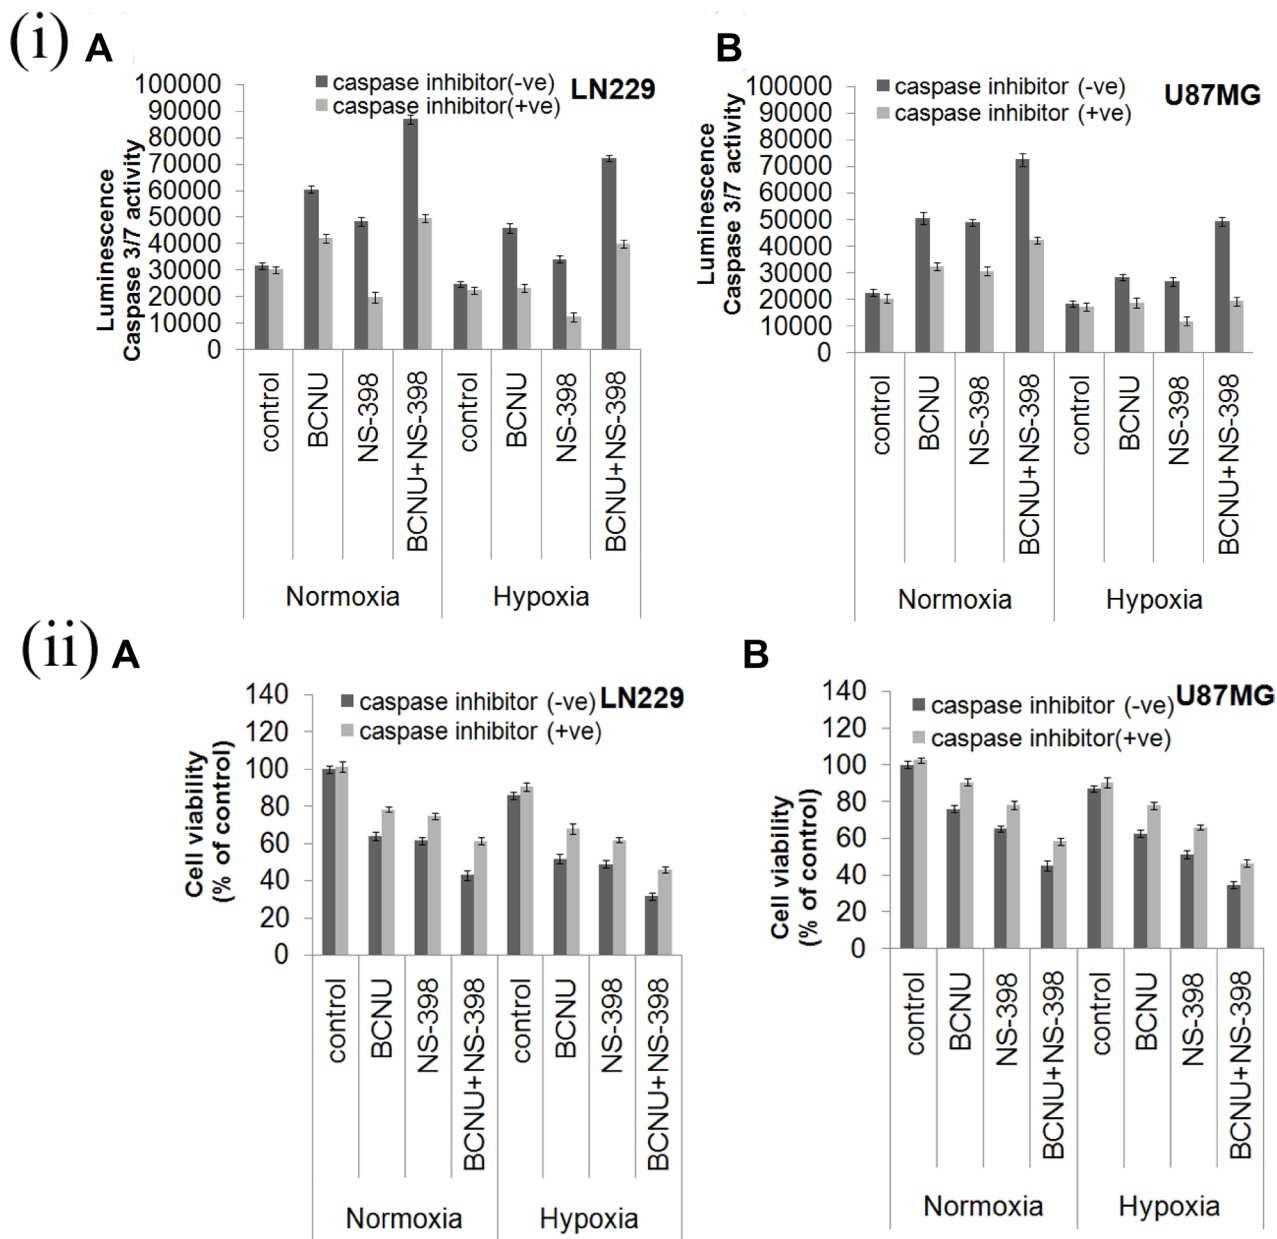

**Figure 4:** (i) Drug induced Caspase 3/7 activity and effect of caspase inhibitor. Cells were treated with BCNU, NS-398 and BCNU + NS-398 and caspase 3/7 activity was assessed after 48 hours. Caspase 3/7 activity was upregulated in the combination of BCNU and NS-398 as compared to single agents under both hypoxia and normoxia in (A) LN229 and (B) U87MG cell lines. Addition of caspase inhibitor reduced drug induced caspase activity. Results were expressed as mean  $\pm$  SD of three experimental replicates. (ii) Cell viability analysis after treatment with caspase inhibitor. Both cells lines were treated with BCNU, NS-398 and BCNU + NS-398 in presence and absence of caspase inhibitor and MTT assay was done after 72 hours. The caspase inhibitor was able to reverse the decrease in cell viability by both single agent and combination in (A) LN229 and (B) U87MG cell lines. Overall the results indicate the role of caspase 3/7 activity in determining reduced cell viability, induced by the drug combination.

We further found that treatment of the gliosphere with the combination resulted in the abrogation of gliosphere formation, though scattered clusters of cells were observed (Figure 9(i)). Abrogation of gliosphere was indicated by reduced size as well as number of gliospheres (Table 1A and 1B). This was apparent in both hypoxia and normoxia. The experiment was continued for 10 days. There was no further growth of cells in the combination. CD133 is known to be glioma cancer stem cell marker, and was found to be upregulated under hypoxia as compared to normoxia. CD133 levels were reduced after drug treatment, and the effect of the drug combination was more than seen by for a single agent (Figure 9(ii)).

## DISCUSSION

Grade IV glioma (Glioblastoma) show a high degree of hypoxia. Indeed hypoxia and neovascularization are amongst the essential criteria for histological diagnosis of glioblastoma. The hypoxic core

of the tumor is responsible for many of the aggressive features of a tumor, including chemoresistance and reduced survival. Hypoxia inducible factors like HIFs are known to aggravate tumorigenesis by inducing epithelial to mesenchymal transition and stem cell like phenotype [38]. These cancer stem cell populations not only induce tumorigenesis but are also involved in reducing therapeutic efficacy of chemotherapeutic agents. Hypoxia is also known to maintain the self renewal capacity of cancer stem cells by the induction of stemness genes like Oct4, c-myc and Nanog [49, 50].

It has been reported that hypoxia regulates the expression of pro-inflammatory genes like COX-2, NOS2, PTX3 in glioblastoma cancer stem cells [51]. Up-regulation of COX-2 has been reported in many tumors and is implicated in increased resistance to cytotoxic therapies, cell proliferation, migration, invasion, angiogenesis and cancer stem like phenotype which helps in progression, metastasis and relapse of the malignancy [8, 52–54]. It has been established that Hypoxia Inducing Factor 1 alpha (HIF-1 $\alpha$ ), a regulator of

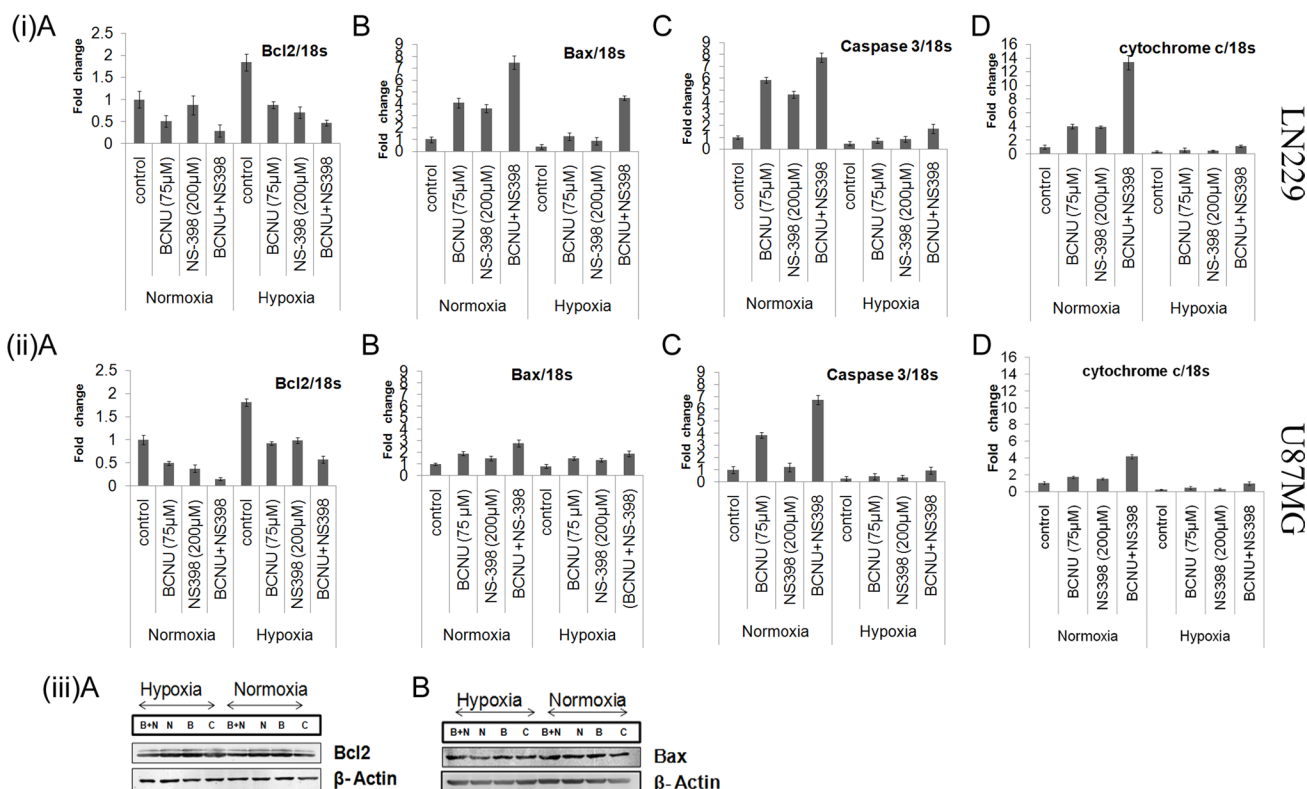

**Figure 5:** (i, ii) Expression of pro-apoptotic and anti-apoptotic markers under various conditions. This figure shows the quantitative mRNA expression for both pro-apoptotic markers (Bax, cytochrome c and caspase 3) and anti-apoptotic marker (Bcl2) by Real time PCR. There was more up-regulation of the pro-apoptotic markers and more down-regulation of the anti-apoptotic marker by the combination as compared to single agent under both hypoxia and normoxia in (i) LN229 and (ii) U87MG cell lines. Results were expressed as mean  $\pm$  SD of three experimental replicates. (iii) Western blot analysis of Bcl2 and Bax in the LN229 cell line. The protein levels of Bcl2 and Bax were also studied in the LN229 cell line. Bax was up-regulated and Bcl2 was down-regulated by the combination as compared to single agent under normoxia and hypoxia. Lane C denotes control, Lane B denotes BCNU, Lane N denotes NS-398 and Lane (B + N) denotes BCNU + NS-398.

oxygen homeostasis in tumor microenvironment, elevates COX-2 expression by regulating it at transcriptional level [55] and is also linked with increased levels of PGE<sub>2</sub> [56]. Specific inhibitors of COX-2 have been shown to decrease cell proliferation upto a certain extent in many tumors including glioma. Many of such COX-2 inhibitors (Mavacoxib, Celecoxib) are in preclinical or clinical trials for attenuation of chemoresistance in gliomas or other cancers though they are still not commonly used [16, 17, 57–60].

Since progression of the disease depends on the interactions of several intrinsic as well as extrinsic factors, recent therapeutic advancements focus on multi-modal drug combinations to target more than one potential molecule for better outcomes. The pathways being targeted by drug combinations include autophagy, PI3K/AKT pathway and angiogenesis. [6, 61–63]. This strategy can give rise to better therapeutic options for patient care. In this work we have tried to develop a strategy for glioma cells as well as cancer stem cells with high COX-2 expression, which would be effective in both hypoxia

and normoxia. The broad aim is to deleteriously tackle the effects of protumorigenic inflammation.

We have earlier shown that COX-2 is over-expressed in a sub-set of GBM [64]. Our earlier work also shows that a member of the cadherin family, FAT1, drives COX-2 expression and is also a positive upstream regulator of HIF-1 $\alpha$ , stemness and EMT under hypoxia [65, 66]. A prototype COX-2 inhibitor, NS-398 was used in this study. To further improve efficacy, NS-398 was combined with known anti-cancer drugs (BCNU, CP, 2-DG and TMZ) which affect different survival pathways of glioma cells. For comparative analysis of the cytotoxic effect, cells were also treated with either of the single agents under hypoxia and normoxia. For all drugs tested, there was relative resistance under hypoxia. BCNU was the only drug to show synergistic effect which overcame hypoxia induced chemoresistance. BCNU is recommended for the treatment of newly diagnosed high-grade glioma patients in whom 90% or more tumor has been resected. However, it does not appear to greatly prolong the medial survival [67–69]. It has been reported that as a single agent, BCNU is able to

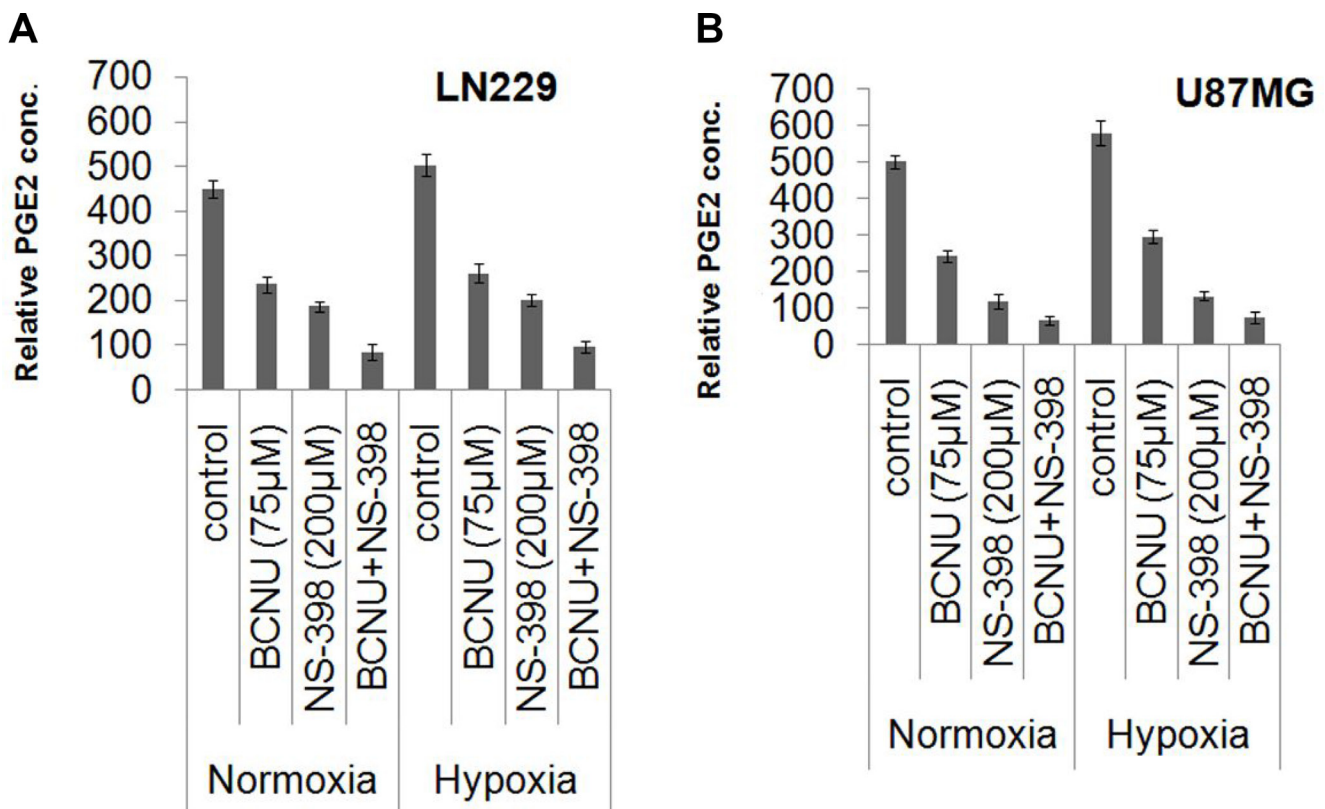

**Figure 6: Relative PGE<sub>2</sub> concentrations indicating COX-2 activity under various conditions.** Culture supernatants of drug treated (BCNU, NS-398 and BCNU + NS-398) and control samples of LN229 and U87MG cell lines under hypoxia and normoxia were assayed for PGE<sub>2</sub> concentration by EIA kit. Relative PGE<sub>2</sub> concentration was significantly reduced in the cells treated with the combination (BCNU + NS-398) under both hypoxia and normoxia in (A) LN229 and (B) U87MG cell lines. Results were expressed as mean  $\pm$  SD of three experimental replicates. The combination had more effect than either single agent. This was true for normoxia ( $p < 0.01$  with BCNU and  $p < 0.05$  with NS-398) as well as hypoxia ( $p < 0.01$  for BCNU and  $p < 0.01$  for NS-398) for LN229. Also, for U87MG the levels of significance for normoxia were  $p < 0.05$  for BCNU and  $p < 0.05$  for NS-398. For hypoxia the levels of significance were  $p < 0.01$  for BCNU and  $p < 0.05$  for NS-398.



reduce the survival of the cancer cell but it is not able to kill the population of cancer stem cells [70]. For BCNU, there has been several clinical trials using it in combination with other drugs not only in glioma, but also in other cancers like melanoma, colorectal (<https://www.clinicaltrials.gov/ct2/show/NCT00003346>, [NCT00005981](https://www.clinicaltrials.gov/ct2/show/NCT00005981)). Some of the

drugs used along with BCNU have been Temozolomide, O6-benzylguanine, acetaminophen, acetylcysteine (<https://www.clinicaltrials.gov/ct2/show/NCT00362921>, [NCT00003346](https://www.clinicaltrials.gov/ct2/show/NCT00003346), [NCT00005981](https://www.clinicaltrials.gov/ct2/show/NCT00005981), [NCT00005637](https://www.clinicaltrials.gov/ct2/show/NCT00005637)). For Celecoxib, the most commonly used COX-2 inhibitor, the combination trials have been mostly for other cancers like

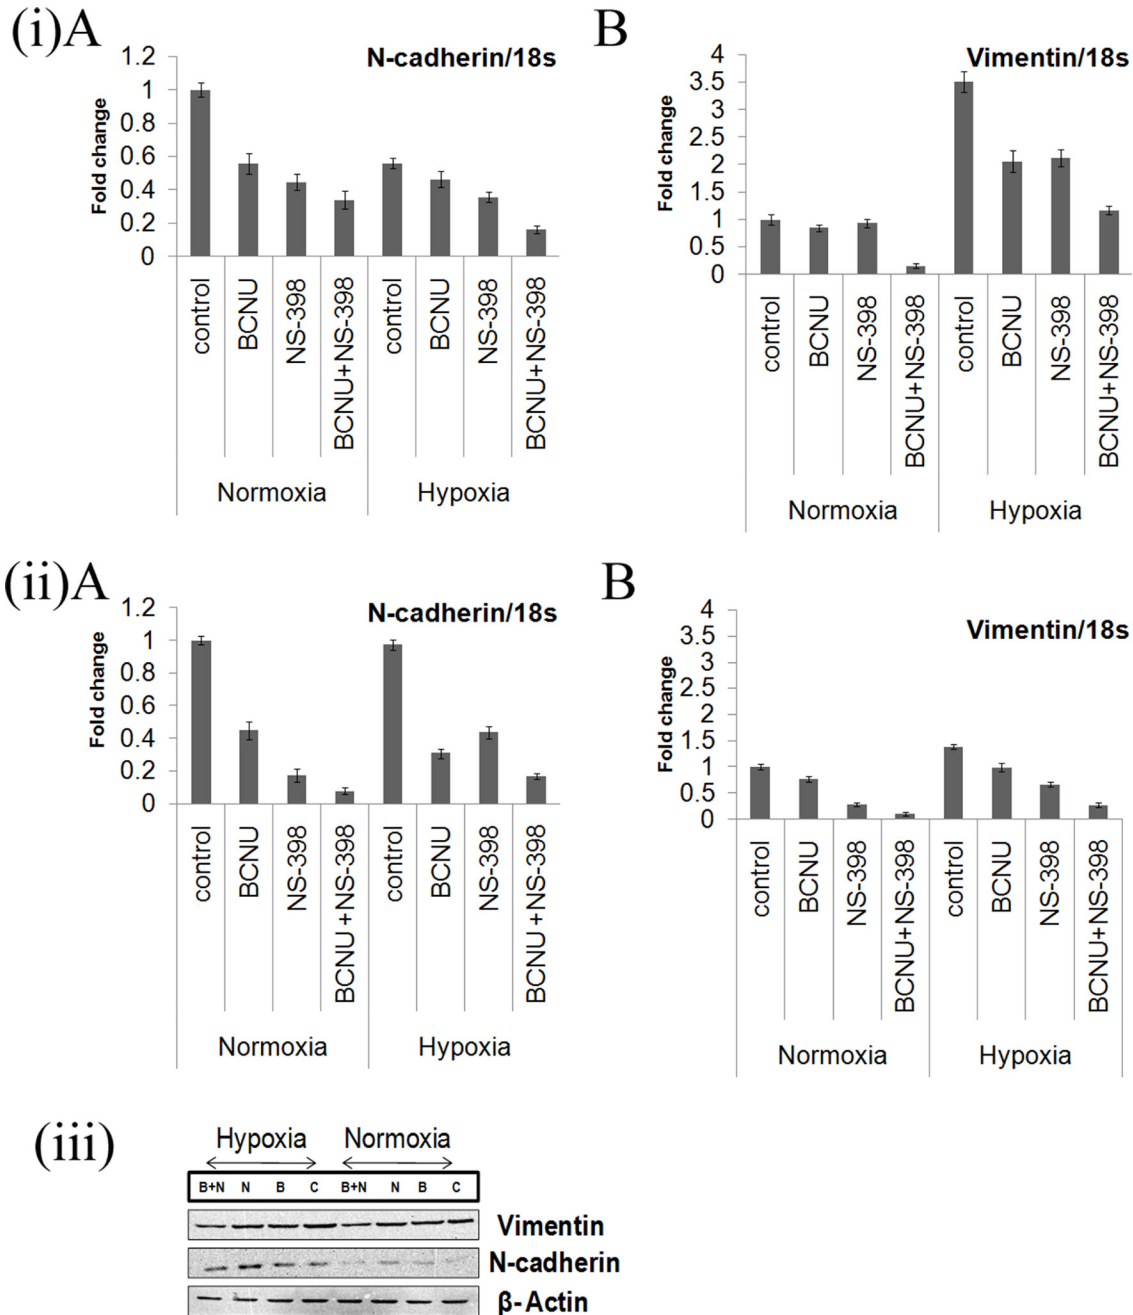

**Figure 7:** (i, ii) Real time PCR analysis of mRNA expression of EMT markers vimentin and N-cadherin. mRNA levels of the markers of epithelial to mesenchymal transition (Vimentin and N-cadherin) were more down-regulated by the combination of BCNU and NS-398 as compared to single agent in (i) LN229 and (ii) U87MG cell lines under hypoxia and normoxia. Results were expressed as mean  $\pm$  SD of three experimental replicates. (iii) Western blot analysis of N-cadherin and Vimentin in the LN229 cell line. The protein levels of Vimentin and N-cadherin were also studied in the LN229 cell line. Here again, the decrease by the combination was more than that for single agent in both hypoxia and normoxia. Lane C denotes control, Lane B denotes BCNU, Lane N denotes NS-398 and Lane (B + N) denotes BCNU + NS-398.

prostate, ovarian, colorectal (<https://www.clinicaltrials.gov/ct2/show/NCT00215345>, NCT01124435, NCT00230399). Some of the drugs used with celecoxib have included taxotere, carboplatin, capecitabine, Irinotecan (<https://www.clinicaltrials.gov/ct2/show/NCT00215345>, NCT01124435, NCT00230399). To our knowledge there has been no trial with a combination of BCNU and a COX-2 inhibitor. Since one of the drugs (BCNU) used in this study is already in clinical usage and other molecule (NS-398) is a prototype COX-2 inhibitor, the synergistic combination of these drugs

may prompt the trials for this combination/equivalent drugs. Sub-lethal doses of the drug were used to simulate the intra-tumoral environment, where there is poor perfusion and reduced availability of the drugs in the interior core- a condition which induces drug resistance [71].

The combination of BCNU and NS-398 resulted in decreased cell viability and increased caspase dependent apoptosis of glioma cells under hypoxia as well as normoxia. There were concordant changes in pro and anti apoptotic markers. The effect of the combination went

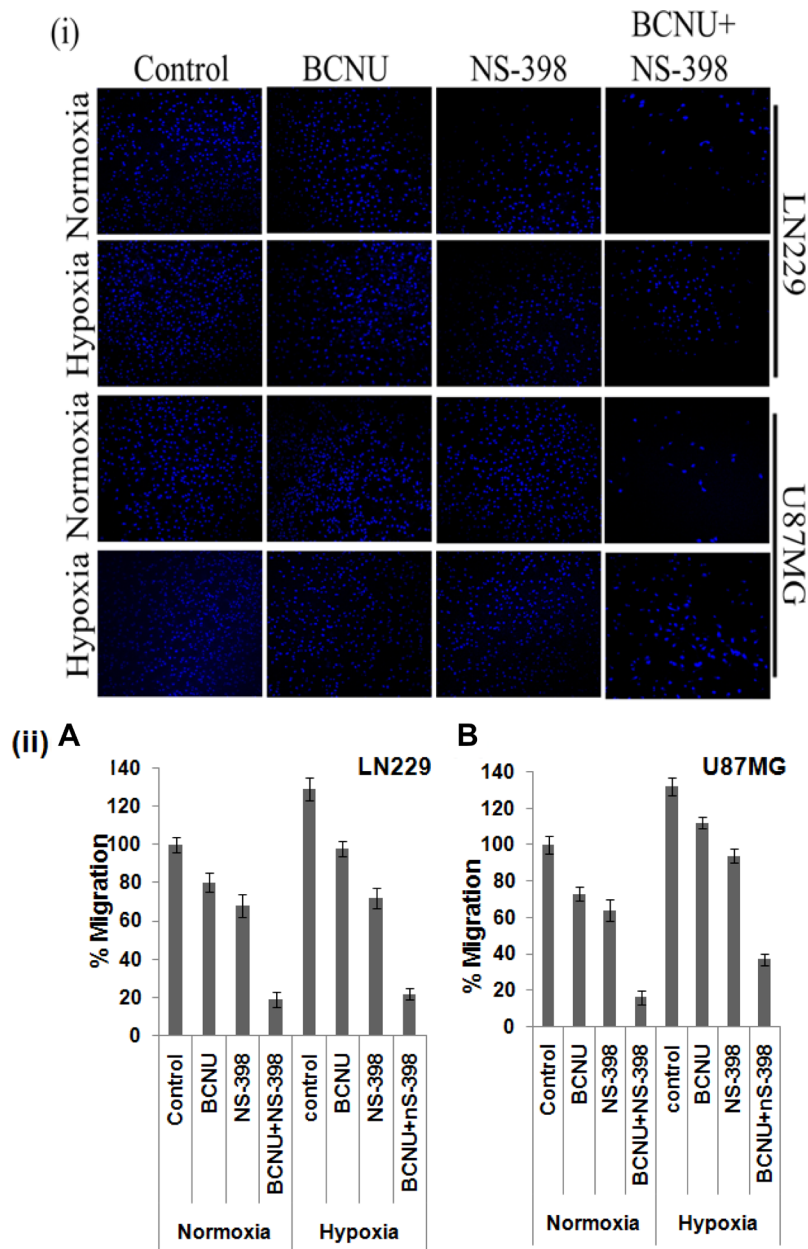

**Figure 8: Cell migration as assessed by transwell membrane assay.** There was greater reduction in the migration of both cell lines after treatment with the combination as compared to the single agent under both hypoxia and normoxia. A pictorial representation of the cells is given in (i) while the percentage of the migrated cells are depicted in (ii). The combination had more effect than either single agent. This was true for normoxia ( $p < 0.01$  with BCNU and  $p < 0.05$  with NS-398) as well as hypoxia ( $p < 0.001$  for BCNU and  $p < 0.01$  for NS-398) for LN229. Also, for U87MG the levels of significance for normoxia were  $p < 0.01$  for BCNU and  $p < 0.05$  for NS-398. For hypoxia the levels of significance were  $p < 0.001$  for BCNU and  $p < 0.01$  for NS-398.

beyond merely additive to synergistic, under both hypoxia and normoxia. The synergistic action of the COX-2 inhibitor and BCNU was finally reflected in the reduction of PGE2, which was reduced more by the combination under both hypoxic and normoxic conditions. Even the enhanced levels of PGE2 in hypoxia showed greater reduction by the combination as compared to single agent. The effect was also seen on both EMT markers and cell migration.

It is important to note the effect of the combination on gliospheres, where the formation of distinct gliospheres was abrogated in both hypoxia and normoxia. Since a glioma stem cell like phenotype could be responsible for chemoresistance as well as recurrence

of the malignancy, this combination has its potential to act through abrogation of stemness. CD133 which is a known glioma cancer stem cell marker [37] was also found to be reduced by the combination as compared to single agent.

To summarize, the unique feature of this combination that suppresses pro-tumorigenic inflammation is that it is effective under both hypoxia and normoxia. Inflammation is one of the pathways through which hypoxic chemoresistance acts, and the synergistic effects of this combination are evident at the level of both monolayer and gliosphere cultures. As BCNU is already an approved drug and an increasing number of anti-inflammatory drugs notably COX-2 inhibitors are

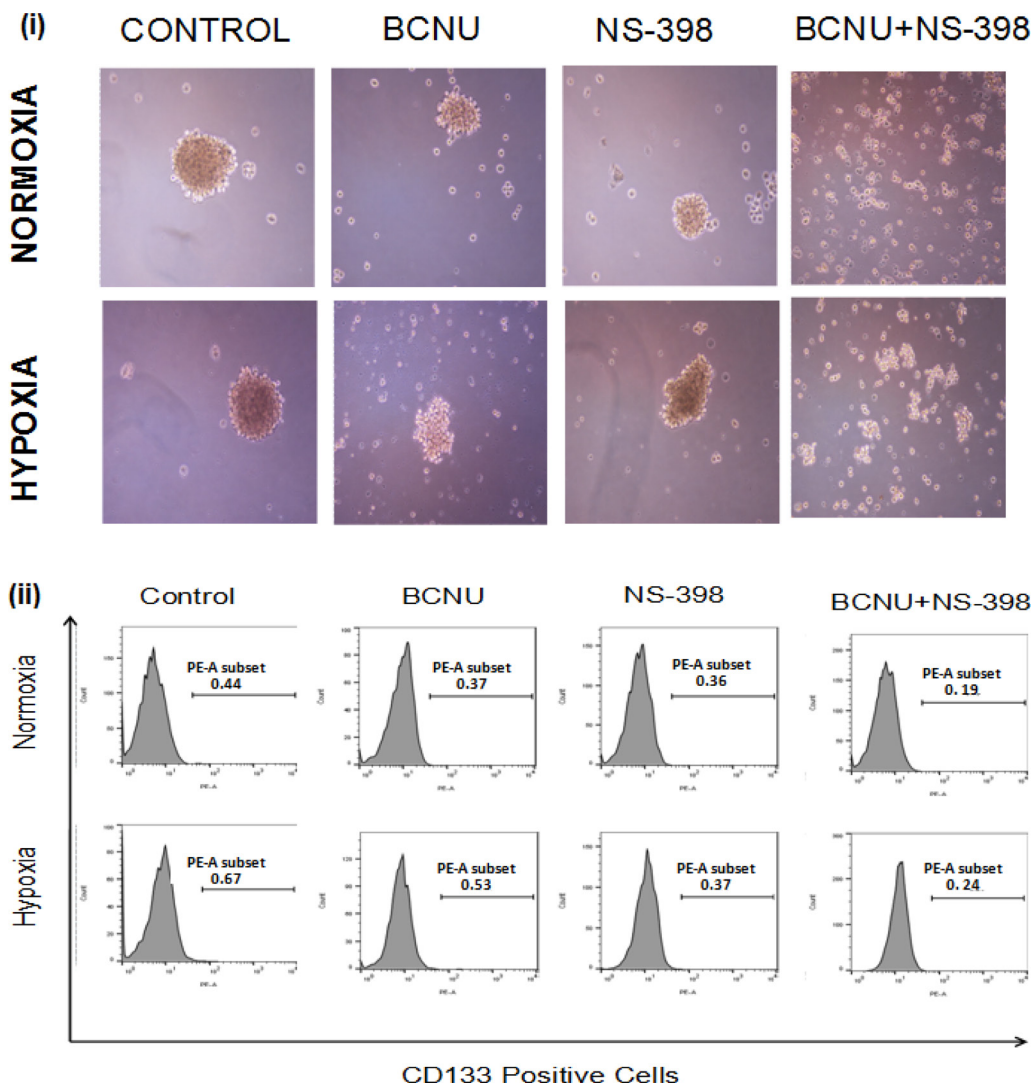

**Figure 9:** Photomicrographs of (i) gliospheres of U87MG cells. There was reduction in the size of the gliosphere of the U87MG cells after treatment with the single agent under both hypoxia and normoxia. After treatment with the combination, the formation of gliospheres was abrogated in both the conditions, though some small cell clusters of less than 100  $\mu$ m were observed. (ii) Analysis of CD133 expression in U87MG gliospheres. After 48 hours of drug treatment of gliospheres under hypoxia and normoxia, expression of CD133 was checked through flow cytometry. There was reduction in the expression of CD133 in gliospheres treated with the combination (BCNU + NS-398) as compared to the single agent under both hypoxia and normoxia. The number on each plot depicts the percentage of CD133 positive cells.

**Table 1A: The mean size of gliomaspheres formed after drug treatment under normoxia and hypoxia in U87MG cell line**

| U87MG    | Control             | BCNU              | NS-398            | BCNU + NS-398    |
|----------|---------------------|-------------------|-------------------|------------------|
| Normoxia | 366.9 ± 80.54 μm    | 232.02 ± 68.21 μm | 177.3 ± 53.9 μm   | 75.0 ± 17.01 μm  |
| Hypoxia  | 359.42 ± 113.429 μm | 158.48 ± 49.7 μm  | 210.13 ± 56.67 μm | 71.73 ± 11.60 μm |

It was seen that in the combination (Figure 9(i)), there was no compact sphere formation, but loose aggregates are formed. The diameter of the same was measured. Diameter of aggregation of cells >100 μm was taken as sphere [48]. For U87MG gliomaspheres, the levels of significance for normoxia were  $p < 0.05$  for BCNU and  $p < 0.01$  for NS-398. For hypoxia the levels of significance were  $p < 0.01$  for BCNU and  $p < 0.01$  for NS-398.

**Table 1B: The mean number of gliomaspheres formed after drug treatment under normoxia and hypoxia in U87MG cell line**

| U87MG    | Control  | BCNU   | NS-398  | BCNU + NS-398 |
|----------|----------|--------|---------|---------------|
| Normoxia | 112 ± 11 | 91 ± 7 | 86 ± 9  | 0             |
| Hypoxia  | 72 ± 6   | 52 ± 9 | 58 ± 10 | 0             |

In the combination only poorly compacted aggregates were seen.

being approved for therapy, this prototype combination is worth investigating in further preclinical and clinical studies.

## MATERIALS AND METHODS

### Cell culture

Human glioma grade IV cell lines (LN229 and U87MG) were cultured as per ATCC recommendations. Cells were maintained under normoxic (20% O<sub>2</sub>, 5% CO<sub>2</sub>) and severe hypoxic conditions (0.2% O<sub>2</sub>, 5% CO<sub>2</sub>) in airtight chambers through Anoxomat gas proportionater (Mart Microbiology, Netherlands)

### Drug treatment and cell viability assay

Cells were seeded in 96 well plate and further they were exposed to hypoxia and normoxia. After further 24 hours, drug treatment was given from the respective stock solutions of CP, 2-DG, TMZ, BCNU and NS-398. MTT assay was done after 72 hrs of drug treatment as described by Jalota *et al.* 2016 [6].

### Combination index analysis

Drug interaction study was carried out based on combination index (CI) as described by Zhao *et al.* [47]. This clearly distinguishes additive effects from synergism, and a CI of less than 0.9 is taken as synergistic.

### Analysis by flow cytometry (PI and AnnexinV staining)

Cells were seeded and then synchronized for 8 hours. Further, they were exposed either to hypoxia or normoxia.

After further 24 hours, drug treatment (BCNU, NS-398 and combination of both) was given. Study of percentage of apoptotic cells was done after 72 hours of drug treatment as described by Jalota *et al.* 2016 [6]. PI and Annexin V staining was done after 48 hours of drug treatment (BCNU, NS-398 and combination of both). Cells were trypsinized, washed and stained with PI and Annexin V. Acquisition of cells was done in BD FACSCanto. Analysis of dual staining was done by BD FACSDiva software.

### Immunoblotting

Cells were treated for 48 hours under hypoxia and normoxia and cell lysates were made and Western blotting was done as described by Jalota *et al.* 2016 [6]. COX-2, Bax, Vimentin and N-cadherin antibody were purchased from Cell Signaling. Bcl2 and β-actin antibody were procured from Abcam.

### RNA Isolation and real time PCR

RNA isolation and cDNA synthesis was done after drug treatment under hypoxia and normoxia as described by Jalota *et al.* 2016 [6]. To check the expression of the genes at mRNA level using cDNA, Real time PCR was done using gene specific primers and fluorescent SYTO9 dye. List of primers is mentioned in Supplementary Table 1.

### Caspase 3/7 assay

Cells were seeded in 96 well plate and after 24 hours transferred to different oxygen concentrations (20% O<sub>2</sub> and 0.2% O<sub>2</sub>). Caspase 3/7 activity was determined using Caspase-Glo 3/7 assay (Promega) after 48 hours of drug treatment (BCNU, NS-398 and combination of both) according to manufacturer's protocol.

## PGE<sub>2</sub> ELISA

Cells were seeded and after 24 hours transferred to different oxygen concentrations (20% O<sub>2</sub> and 0.2% O<sub>2</sub>) and after further 24 hours drug treatment was given. Culture supernatants of the drug treated cells were collected after 72 hours of drug treatment. The concentration of PGE<sub>2</sub> secreted into the medium was measured with an EIA kit for human PGE<sub>2</sub> (Cayman Chemical) following manufacturer's instruction.

## Migration assay

Cells were seeded in 6 well plate and after 48 hours of drug treatment under hypoxia and normoxia, cells were proceeded using Boyden transwell chambers for migration assay according to manufacturer's protocol. The cells which migrated the transwell were counted after 24 hours of drug treatment for U87MG and LN229 cell lines. Number of cells which migrated the transwell were observed under microscope. Cells were counted in five different fields.

## Culture of gliomaspheres and analysis of size, number of spheres as well as stemness after drug treatment

Glioma cells U87MG were cultured in DMEM F-12 media (Gibco) supplemented with B27 (Gibco), bFGF and EGF supplement. Gliosphere formation started at 3th day under both hypoxia and normoxia. After 5 days of gliosphere formation under hypoxia and normoxia, drug treatment was given to gliospheres under hypoxia and normoxia. After further 24 hours, gliospheres were dissociated and cells were allowed to form gliospheres for 48 hours after drug treatment. Total number of spheres were then observed, counted and their diameters determined by the NIS elements BR 2.3. Only those compact aggregates that had a diameter of more than 100 µm were taken as spheres [48]. For assessment of CD133 positive cells, with or without drug treatment, cells were allowed to form gliospheres and treated with drug or combination as described above. After 48 hours of drug treatment, cells were dissociated and stained for CD133. For staining, gliospheres were dissociated, washed and incubated with CD133 antibody (Miltenyi Biotech) in BSA at room temperature. Cells were then again washed and fixed with 4% paraformaldehyde. Cells fluorescence was acquired in BD FACS Canto. Analysis was done by Flow Jo Software.

## Cell viability after addition of pan caspase inhibitor

Drug treatment was given in combination with caspase inhibitor Q-VD-OPh (Calbiochem) to glioma cells (LN229 and U87MG) after further 24 hours of hypoxia

and normoxia. Cells were treated in different groups with or without caspase inhibitor. These included either of the single agents as well as the combination. After 48 hours of treatment, caspase 3/7 assay was done and after 72 hours cell viability was done by MTT assay. Cell viability assay for the drug combination in comparison to control for cells which were treated with or without caspase inhibitor was done at 24, 48 and 72 hours after drug exposure.

## Statistical analysis

Statistical differences were assessed using a Student's *t*-test and a probability (*p*) value < 0.05 was considered significant. Results are expressed as mean ± SD of three experimental triplicates. All the experiments were done in triplicate and each experiment was repeated atleast three times. The results of the experiment presented in the figures are from the experimental triplicates.

## Abbreviations

GB: Glioblastoma; EMT: Epithelial Mesenchymal Transition; TMZ: Temozolomide; CP: Cisplatin; 2-Deoxy-D-glucose; CSC: Cancer stem cells; EGFR: Epithelial growth factor receptor; PGE<sub>2</sub>: prostaglandins E<sub>2</sub>; COX: 2-Cyclooxygenase 2; HIF-1α: Hypoxia inducible Factor-1α.

## ACKNOWLEDGMENTS AND FUNDING

The study was supported by the National Postdoctoral Fellowship (SERB) to Akansha Jalota, the J C Bose Fellowship (DST) to Prof. Subrata Sinha and the core institutional grant of the National Brain Research Centre (NBRC) India. Fellowships provided earlier by Indian Council of Medical Research (ICMR) and the current National Postdoctoral Fellowship (SERB) to Akansha Jalota are gratefully acknowledged. Mukesh Kumar is thankful to ICMR for Research Associate fellowship. Prof. B. C. Das is thankful to Department of Science and Technology (DST) for the award of J C Bose fellowship and Dr. Ajay Kumar Yadav to Department of Biotechnology (DBT) for Ramalingaswamy fellowship. The technical support provided by Ms. Jyoti, Mr. Pappu and Mr. Mukesh is deeply acknowledged. We acknowledge the assistance of Digital Information Centre of National Brain Research Centre.

## CONFLICTS OF INTEREST

The authors disclose no potential conflicts of interest.

## REFERENCES

1. Adamski J, Price A, Dive C, Makin G. Hypoxia-induced cytotoxic drug resistance in osteosarcoma is independent

- of HIF-1 $\alpha$ . *PLoS One*. 2013; 8:e65304. <https://doi.org/10.1371/journal.pone.0065304>.
2. Vinogradov S, Wei X. Cancer stem cells and drug resistance: the potential of nanomedicine. *Nanomedicine (Lond)*. 2012; 7:597–615. <https://doi.org/10.2217/nnm.12.22>.
  3. Pattabiraman DR, Weinberg RA. Tackling the cancer stem cells - what challenges do they pose? *Nat Rev Drug Discov*. 2014; 13:497–512. <https://doi.org/10.1038/nrd4253>.
  4. Safa AR, Saadatzadeh MR, Cohen-Gadol AA, Pollok KE, Bijangi-Vishehsaraei K. Glioblastoma stem cells (GSCs) epigenetic plasticity and interconversion between differentiated non-GSCs and GSCs. *Genes Dis*. 2015; 2:152–63. <https://doi.org/10.1016/j.gendis.2015.02.001>.
  5. Borst P. Cancer drug pan-resistance: pumps, cancer stem cells, quiescence, epithelial to mesenchymal transition, blocked cell death pathways, persists or what? *Open Biol*. 2012; 2:120066. <https://doi.org/10.1098/rsob.120066>.
  6. Jalota A, Kumar M, Das BC, Yadav AK, Chosdol K, Sinha S. Synergistic increase in efficacy of a combination of 2-deoxy-D-glucose and cisplatin in normoxia and hypoxia: switch from autophagy to apoptosis. *Tumour Biol*. 2016; 37:12347–58. <https://doi.org/10.1007/s13277-016-5089-8>.
  7. Kurihara Y, Hatori M, Ando Y, Ito D, Toyoshima T, Tanaka M, Shintani S. Inhibition of cyclooxygenase-2 suppresses the invasiveness of oral squamous cell carcinoma cell lines via down-regulation of matrix metalloproteinase-2 production and activation. *Clin Exp Metastasis*. 2009; 26:425–32. <https://doi.org/10.1007/s10585-009-9241-3>.
  8. Xu K, Wang L, Shu HK. COX-2 overexpression increases malignant potential of human glioma cells through Id1. *Oncotarget*. 2014; 5:1241–52. <https://doi.org/10.18632/oncotarget.1370>.
  9. Sharma V, Dixit D, Ghosh S, Sen E. COX-2 regulates the proliferation of glioma stem like cells. *Neurochem Int*. 2011; 59:567–71. <https://doi.org/10.1016/j.neuint.2011.06.018>.
  10. Herseth JI, Refsnes M, Låg M, Schwarze PE. Role of IL-1 beta and COX2 in silica-induced IL-6 release and loss of pneumocytes in co-cultures. *Toxicol In Vitro*. 2009; 23:1342–53. <https://doi.org/10.1016/j.tiv.2009.06.031>.
  11. Candido J, Hagemann T. Cancer-related inflammation. *J Clin Immunol*. 2013; 33:S79–84. <https://doi.org/10.1007/s10875-012-9847-0>.
  12. Hanahan D, Weinberg RA. Hallmarks of cancer: the next generation. *Cell*. 2011; 144:646–74. <https://doi.org/10.1016/j.cell.2011.02.013>.
  13. Bocca C, Ievolella M, Autelli R, Motta M, Mosso L, Torchio B, Bozzo F, Cannito S, Paternostro C, Colombatto S, Parola M, Miglietta A. Expression of Cox-2 in human breast cancer cells as a critical determinant of epithelial-to-mesenchymal transition and invasiveness. *Expert Opin Ther Targets*. 2014; 18:121–35. <https://doi.org/10.1517/14728222.2014.860447>.
  14. Gately S. The contributions of cyclooxygenase-2 to tumor angiogenesis. *Cancer Metastasis Rev*. 2000; 19:19–27.
  15. Neil JR, Johnson KM, Nemenoff RA, Schiemann WP. Cox-2 inactivates Smad signaling and enhances EMT stimulated by TGF-beta through a PGE2-dependent mechanisms. *Carcinogenesis*. 2008; 29:2227–35. <https://doi.org/10.1093/carcin/bgn202>.
  16. Majumder M, Xin X, Liu L, Tutunea-Fatan E, Rodriguez-Torres M, Vincent K, Postovit LM, Hess D, Lala PK. COX-2 Induces Breast Cancer Stem Cells via EP4/PI3K/AKT/NOTCH/WNT Axis. *Stem Cells*. 2016; 34:2290–305. <https://doi.org/10.1002/stem.2426>.
  17. Tian J, Hachim MY, Hachim IY, Dai M, Lo C, Raffa FA, Ali S, Lebrun JJ. Cyclooxygenase-2 regulates TGF $\beta$ -induced cancer stemness in triple-negative breast cancer. *Sci Rep*. 2017; 7:40258. <https://doi.org/10.1038/srep40258>.
  18. Valverde A, Peñarando J, Cañas A, López-Sánchez LM, Conde F, Hernández V, Peralbo E, López-Pedraza C, De la Haba-Rodríguez J, Aranda E, Rodríguez-Ariza A. Simultaneous inhibition of EGFR/VEGFR and cyclooxygenase-2 targets stemness-related pathways in colorectal cancer cells. *PLoS One*. 2015; 10:e0131363. <https://doi.org/10.1371/journal.pone.0131363>.
  19. Yao M, Lam EC, Kelly CR, Zhou W, Wolfe MM. Cyclooxygenase-2 selective inhibition with NS-398 suppresses proliferation and invasiveness and delays liver metastasis in colorectal cancer. *Br J Cancer*. 2004; 90:712–9. <https://doi.org/10.1038/sj.bjc.6601489>.
  20. Cao Y, Prescott SM. Many actions of cyclooxygenase-2 in cellular dynamics and in cancer. *J Cell Physiol*. 2002; 190:279–86. <https://doi.org/10.1002/jcp.10068>.
  21. Lee EJ, Choi EM, Kim SR, Park JH, Kim H, Ha KS, Kim YM, Kim SS, Choe M, Kim JI, Han JA. Cyclooxygenase-2 promotes cell proliferation, migration and invasion in U2OS human osteosarcoma cells. *Exp Mol Med*. 2007; 39:469–76. <https://doi.org/10.1038/emmm.2007.51>.
  22. Seliger C, Meier CR, Becker C, Jick SS, Bogdahn U, Hau P, Leitzmann MF. Use of Selective Cyclooxygenase-2 Inhibitors, Other Analgesics, and Risk of Glioma. *PLoS One*. 2016; 11:e0149293. <https://doi.org/10.1371/journal.pone.0149293>.
  23. Mazhar D, Ang R, Waxman J. COX inhibitors and breast cancer. *Br J Cancer*. 2006; 94:346–50. <https://doi.org/10.1038/sj.bjc.6602942>.
  24. Xu XC. COX-2 inhibitors in cancer treatment and prevention, a recent development. *Anticancer Drugs*. 2002; 13:127–37.
  25. Bae SH, Jung ES, Park YM, Kim BS, Kim BK, Kim DG, Ryu WS. Expression of cyclooxygenase-2 (COX-2) in hepatocellular carcinoma and growth inhibition of hepatoma cell lines by a COX-2 inhibitor, NS-398. *Clin Cancer Res*. 2001; 7:1410–8.
  26. Ferguson S, Hébert RL, Laneville O. NS-398 upregulates constitutive cyclooxygenase-2 expression in the M-1 cortical collecting duct cell line. *J Am Soc Nephrol*. 1999; 10:2261–71.

27. Bocca C, Bozzo F, Cannito S, Parola M, Miglietta A. Celecoxib inactivates epithelial-mesenchymal transition stimulated by hypoxia and/or epidermal growth factor in colon cancer cells. *Mol Carcinog.* 2012; 51:783–95. <https://doi.org/10.1002/mc.20846>.
28. Wang Z, Fan Z, Jiang H, Qu J. Selective Cox-2 inhibitor celecoxib induces epithelial-mesenchymal transition in human lung cancer cells via activating MEK-ERK signaling. *Carcinogenesis.* 2013; 34:638–46. <https://doi.org/10.1093/carcin/bgs367>.
29. Liu R, Zheng J, Li C, Pang Y, Zheng Q, Xu X, Liu P. Celecoxib induces epithelial-mesenchymal transition in epithelial ovarian cancer cells via regulating ZEB1 expression. *Arch Gynecol Obstet.* 2015; 291:1361–9. <https://doi.org/10.1007/s00404-014-3555-3>.
30. Hayashida T, Jinno H, Kitagawa Y, Kitajima M. Cooperation of cancer stem cell properties and epithelial-mesenchymal transition in the establishment of breast cancer metastasis. *J Oncol.* 2011; 2011:591427. <https://doi.org/10.1155/2011/591427>.
31. Singh A, Settleman J. EMT, cancer stem cells and drug resistance: an emerging axis of evil in the war on cancer. *Oncogene.* 2010; 29:4741–51. <https://doi.org/10.1038/onc.2010.215>.
32. Lin J, Wu H, Shi H, Pan W, Yu H, Zhu J. Combined inhibition of epidermal growth factor receptor and cyclooxygenase-2 leads to greater anti-tumor activity of docetaxel in advanced prostate cancer. *PLoS One.* 2013; 8:e76169. <https://doi.org/10.1371/journal.pone.0076169>.
33. Bedford JS, Mitchell JB. The effect of hypoxia on the growth and radiation response of mammalian cells in culture. *Br J Radiol.* 1974; 47:687–96. <https://doi.org/10.1259/0007-1285-47-562-687>.
34. Brown J. Effects of 2-deoxyglucose on carbohydrate metabolism: review of the literature and studies in the rat. *Metabolism.* 1962; 11:1098–112.
35. Teicher BA. Hypoxia and drug resistance. *Cancer Metastasis Rev.* 1994; 13:139–68.
36. Ahmed AU, Auffinger B, Lesniak MS. Understanding glioma stem cells: rationale, clinical relevance and therapeutic strategies. *Expert Rev Neurother.* 2013; 13:545–55. <https://doi.org/10.1586/ern.13.42>.
37. Brescia P, Ortensi B, Fornasari L, Levi D, Broggi G, Pelicci G. CD133 is essential for glioblastoma stem cell maintenance. *Stem Cells.* 2013; 31:857–69. <https://doi.org/10.1002/stem.1317>.
38. Myszczyzyn A, Czarnecka AM, Matak D, Szymanski L, Lian F, Kornakiewicz A, Bartnik E, Kukwa W, Kieda C, Szczylik C. The Role of Hypoxia and Cancer Stem Cells in Renal Cell Carcinoma Pathogenesis. *Stem Cell Rev.* 2015; 11:919–43. <https://doi.org/10.1007/s12015-015-9611-y>.
39. Evans SM, Judy KD, Dunphy I, Jenkins WT, Hwang WT, Nelson PT, Lustig RA, Jenkins K, Magarelli DP, Hahn SM, Collins RA, Grady MS, Koch CJ. Hypoxia is important in the biology and aggression of human glial brain tumors. *Clin Cancer Res.* 2004; 10:8177–84. <https://doi.org/10.1158/1078-0432.CCR-04-1081>.
40. Friedman HS, Kerby T, Calvert H. Temozolomide and treatment of malignant glioma. *Clin Cancer Res.* 2000; 6:2585–97.
41. Hart MG, Garside R, Rogers G, Stein K, Grant R. Temozolomide for high grade glioma. *Cochrane Database Syst Rev.* 2013; CD007415. <https://doi.org/10.1002/14651858.CD007415.pub2>.
42. Lin SH, Kleinberg LR. Carmustine wafers: localized delivery of chemotherapeutic agents in CNS malignancies. *Expert Rev Anticancer Ther.* 2008; 8:343–59. <https://doi.org/10.1586/14737140.8.3.343>.
43. Dwarakanath BS, Singh D, Banerji AK, Sarin R, Venkataramana NK, Jalali R, Vishwanath PN, Mohanti BK, Tripathi RP, Kalia VK, Jain V. Clinical studies for improving radiotherapy with 2-deoxy-D-glucose: present status and future prospects. *J Cancer Res Ther.* 2009; 5:S21–26. <https://doi.org/10.4103/0973-1482.55136>.
44. Singh D, Banerji AK, Dwarakanath BS, Tripathi RP, Gupta JP, Mathew TL, Ravindranath T, Jain V. Optimizing cancer radiotherapy with 2-deoxy-d-glucose dose escalation studies in patients with glioblastoma multiforme. *Strahlenther Onkol.* 2005; 181:507–14. <https://doi.org/10.1007/s00066-005-1320-z>.
45. Mohanti BK, Rath GK, Anantha N, Kannan V, Das BS, Chandramouli BA, Banerjee AK, Das S, Jena A, Ravichandran R, Sahi UP, Kumar R, Kapoor N, et al. Improving cancer radiotherapy with 2-deoxy-D-glucose: phase I/II clinical trials on human cerebral gliomas. *Int J Radiat Oncol Biol Phys.* 1996; 35:103–11.
46. Silvani A, Eoli M, Salmaggi A, Lamperti E, Maccagnano E, Broggi G, Boiardi A. Phase II trial of cisplatin plus temozolomide, in recurrent and progressive malignant glioma patients. *J Neurooncol.* 2004; 66:203–8.
47. Zhao L, Wientjes MG, Au JL. Evaluation of combination chemotherapy: integration of nonlinear regression, curve shift, isobologram, and combination index analyses. *Clin Cancer Res.* 2004; 10:7994–8004. <https://doi.org/10.1158/1078-0432.CCR-04-1087>.
48. Rahman M, Reyner K, Deleyrolle L, Millette S, Azari H, Day BW, Stringer BW, Boyd AW, Johns TG, Blot V, Duggal R, Reynolds BA. Neurosphere and adherent culture conditions are equivalent for malignant glioma stem cell lines. *Anat Cell Biol.* 2015; 48:25–35. <https://doi.org/10.5115/acb.2015.48.1.25>.
49. Li P, Zhou C, Xu L, Xiao H. Hypoxia enhances stemness of cancer stem cells in glioblastoma: an *in vitro* study. *Int J Med Sci.* 2013; 10:399–407. <https://doi.org/10.7150/ijms.5407>.
50. Li Z, Bao S, Wu Q, Wang H, Eyler C, Sathornsumtee S, Shi Q, Cao Y, Lathia J, McLendon RE, Hjelmeland AB,

- Rich JN. Hypoxia-inducible factors regulate tumorigenic capacity of glioma stem cells. *Cancer Cell*. 2009; 15:501–13. <https://doi.org/10.1016/j.ccr.2009.03.018>.
51. Tafani M, Di Vito M, Frati A, Pellegrini L, De Santis E, Sette G, Eramo A, Sale P, Mari E, Santoro A, Raco A, Salvati M, De Maria R, et al. Pro-inflammatory gene expression in solid glioblastoma microenvironment and in hypoxic stem cells from human glioblastoma. *J Neuroinflammation*. 2011; 8:32. <https://doi.org/10.1186/1742-2094-8-32>.
  52. Tsujii M, Kawano S, DuBois RN. Cyclooxygenase-2 expression in human colon cancer cells increases metastatic potential. *Proc Natl Acad Sci U S A*. 1997; 94:3336–40.
  53. Tsujii M, Kawano S, Tsuji S, Sawaoka H, Hori M, DuBois RN. Cyclooxygenase regulates angiogenesis induced by colon cancer cells. *Cell*. 1998; 93:705–16.
  54. Guo Z, Jiang JH, Zhang J, Yang HJ, Yang FQ, Qi YP, Zhong YP, Su J, Yang RR, Li LQ, Xiang BD. COX-2 Promotes Migration and Invasion by the Side Population of Cancer Stem Cell-Like Hepatocellular Carcinoma Cells. *Medicine (Baltimore)*. 2015; 94:e1806. <https://doi.org/10.1097/MD.0000000000001806>.
  55. Kaidi A, Qualtrough D, Williams AC, Paraskeva C. Direct transcriptional up-regulation of cyclooxygenase-2 by hypoxia-inducible factor (HIF)-1 promotes colorectal tumor cell survival and enhances HIF-1 transcriptional activity during hypoxia. *Cancer Res*. 2006; 66:6683–91. <https://doi.org/10.1158/0008-5472.CAN-06-0425>.
  56. Greenhough A, Smartt HJ, Moore AE, Roberts HR, Williams AC, Paraskeva C, Kaidi A. The COX-2/PGE2 pathway: key roles in the hallmarks of cancer and adaptation to the tumour microenvironment. *Carcinogenesis*. 2009; 30:377–86. <https://doi.org/10.1093/carcin/bgp014>.
  57. Kang KB, Zhu C, Yong SK, Gao Q, Wong MC. Enhanced sensitivity of celecoxib in human glioblastoma cells: Induction of DNA damage leading to p53-dependent G1 cell cycle arrest and autophagy. *Mol Cancer*. 2009; 8:66. <https://doi.org/10.1186/1476-4598-8-66>.
  58. Pang LY, Argyle SA, Kamida A, Morrison KO, Argyle DJ. The long-acting COX-2 inhibitor mavacoxib (Trocoxil™) has anti-proliferative and pro-apoptotic effects on canine cancer cell lines and cancer stem cells *in vitro*. *BMC Vet Res*. 2014; 10:184. <https://doi.org/10.1186/s12917-014-0184-9>.
  59. Zatelli MC, Molè D, Tagliati F, Minoia M, Ambrosio MR, Degli Uberti E. Cyclo-oxygenase 2 modulates chemoresistance in breast cancer cells involving NF-kappaB. *Cell Oncol*. 2009; 31:457–65. <https://doi.org/10.3233/CLO-2009-0490>.
  60. Rahman M, Selvarajan K, Hasan MR, Chan AP, Jin C, Kim J, Chan SK, Le ND, Kim YB, Tai IT. Inhibition of COX-2 in colon cancer modulates tumor growth and MDR-1 expression to enhance tumor regression in therapy-refractory cancers *in vivo*. *Neoplasia*. 2012; 14:624–33.
  61. Dancey JE, Chen HX. Strategies for optimizing combinations of molecularly targeted anticancer agents. *Nat Rev Drug Discov*. 2006; 5:649–59. <https://doi.org/10.1038/nrd2089>.
  62. Blagosklonny MV. Antiangiogenic therapy and tumor progression. *Cancer Cell*. 2004; 5:13–7.
  63. Blagosklonny MV. How Avastin potentiates chemotherapeutic drugs: action and reaction in antiangiogenic therapy. *Cancer Biol Ther*. 2005; 4:1307–10.
  64. Dikshit B, Irshad K, Madan E, Aggarwal N, Sarkar C, Chandra PS, Gupta DK, Chattopadhyay P, Sinha S, Chosdol K. FAT1 acts as an upstream regulator of oncogenic and inflammatory pathways, via PDCD4, in glioma cells. *Oncogene*. 2013; 32:3798–808. <https://doi.org/10.1038/onc.2012.393>.
  65. Madan E, Dikshit B, Gowda SH, Srivastava C, Sarkar C, Chattopadhyay P, Sinha S, Chosdol K. FAT1 is a novel upstream regulator of HIF1a and invasion of high grade glioma. *Int J Cancer*. 2016; 139:2570–82. <https://doi.org/10.1002/ijc.30386>.
  66. Srivastava C, Irshad K, Dikshit B, Chattopadhyay P, Sarkar C, Gupta DK, Sinha S, Chosdol K. FAT1 modulates EMT and stemness genes expression in hypoxic glioblastoma. *Int J Cancer*. 2018; 142: 805–12. <https://doi.org/10.1002/ijc.31092>.
  67. Stupp R, Hegi ME, van den Bent MJ, Mason WP, Weller M, Mirimanoff RO, Cairncross JG, and European Organisation for Research and Treatment of Cancer Brain Tumor and Radiotherapy Groups, and National Cancer Institute of Canada Clinical Trials Group. Changing paradigms—an update on the multidisciplinary management of malignant glioma. *Oncologist*. 2006; 11:165–80. <https://doi.org/10.1634/theoncologist.11-2-165>.
  68. Yang DI, Chen SD, Yang YT, Ju TC, Xu JM, Hsu CY. Carbamoylating chemoresistance induced by cobalt pretreatment in C6 glioma cells: putative roles of hypoxia-inducible factor-1. *Br J Pharmacol*. 2004; 141:988–96. <https://doi.org/10.1038/sj.bjp.0705687>.
  69. Yang DI, Chen SD, Yin JH, Hsu CY. S-nitrosoglutathione and hypoxia-inducible factor-1 confer chemoresistance against carbamoylating cytotoxicity of BCNU in rat C6 glioma cells. *Ann N Y Acad Sci*. 2005; 1042:229–34. <https://doi.org/10.1196/annals.1338.025>.
  70. Yuan S, Wang F, Chen G, Zhang H, Feng L, Wang L, Colman H, Keating MJ, Li X, Xu RH, Wang J, Huang P. Effective elimination of cancer stem cells by a novel drug combination strategy. *Stem Cells*. 2013; 31:23–34. <https://doi.org/10.1002/stem.1273>.
  71. Srivastava T, Seth A, Datta K, Chosdol K, Chattopadhyay P, Sinha S. Inter-alu PCR detects high frequency of genetic alterations in glioma cells exposed to sub-lethal cisplatin. *Int J Cancer*. 2005; 117:683–9. <https://doi.org/10.1002/ijc.21057>.
